1 **Deriving C<sub>4</sub> photosynthesis parameters by fitting intensive A/C<sub>i</sub> curves**

2 Haoran Zhou<sup>1</sup>, Erol Akçay<sup>1</sup> and Brent R. Helliker<sup>1</sup>

3

4 <sup>1</sup>Department of Biology, University of Pennsylvania, Philadelphia, PA 19104, USA

5

6 *Correspondence:* Haoran Zhou

7 *Address:* 433 S University Ave.

8 314 Leidy Labs

9 Philadelphia, PA 19104

10 *Phone:* 1-215-808-7042

11 *Email:* [haoranzh@sas.upenn.edu](mailto:haoranzh@sas.upenn.edu)

12 Brent R. Helliker: [helliker@sas.upenn.edu](mailto:helliker@sas.upenn.edu)

13 Erol Akçay: [eakcay@sas.upenn.edu](mailto:eakcay@sas.upenn.edu)

14 Running head: Deriving C<sub>4</sub> photosynthesis parameters

15 **ABSTRACT**

16 Measurements of photosynthetic assimilation rate as a function of intercellular CO<sub>2</sub> ( $A/C_i$   
17 curves) are widely used to estimate photosynthetic parameters for C<sub>3</sub> species, yet few  
18 parameters have been reported for C<sub>4</sub> plants, because of a lack of estimation methods. Here,  
19 we extend the framework of widely-used estimation methods for C<sub>3</sub> plants to build  
20 estimation tools by exclusively fitting intensive  $A/C_i$  curves (6-8 more sampling points) for  
21 C<sub>4</sub> using three versions of photosynthesis models with different assumptions about carbonic  
22 anhydrase processes and ATP distribution. We use simulation-analysis, out-of-sample tests,  
23 existing in vitro measurements and chlorophyll-fluorescence-measurements to validate the  
24 new estimation methods. Of the five/six photosynthetic parameters obtained, sensitivity  
25 analyses show that maximal-Rubisco-carboxylation-rate, electron-transport-rate, maximal-  
26 PEP-carboxylation-rate and carbonic-anhydrase were robust to variation in the input  
27 parameters, while day-respiration and mesophyll-conductance varied. Our method provides  
28 a way to estimate carbonic anhydrase activity, a new parameter, from  $A/C_i$  curves, yet also  
29 shows that models that do not explicitly consider carbonic anhydrase yield approximate  
30 results. The two photosynthesis models, differing in whether ATP could freely transport  
31 between RuBP and PEP regeneration processes yielded consistent results under high light,  
32 but they may diverge under low light intensities. Modeling results show selection for  
33 Rubisco of low specificity and high catalytic rate, low leakage of bundle sheath and high  
34 PEPC affinity, which may further increase C<sub>4</sub> efficiency.

35 ***Key words:***  $A/C_i$  curves, C<sub>4</sub>, estimation method, nonlinear curve fitting, photosynthesis  
36 parameters,  $V_{cmax}$ , electron transport, PEP carboxylation rate, carbonic anhydrase

37

38 **Abbreviations:**  $a$ , light absorptance of leaf;  $A_c$ , Rubisco carboxylation assimilation rate;  $AEE$ ,  
39 RuBP carboxylation and PEPc carboxylation limitation assimilation;  $AET$ , RuBP  
40 regeneration and PEP carboxylation limitation assimilation;  $A_g$ , gross CO<sub>2</sub> assimilation rate  
41 per unit leaf area;  $A_j$ , RuBP regeneration assimilation rate;  $A_n$ , net CO<sub>2</sub> assimilation rate per  
42 unit leaf area;  $ATE$ , RuBP carboxylation and PEPc regeneration limitation assimilation;  $ATT$ ,  
43 RuBP regeneration and PEPc regeneration limitation assimilation;  $\alpha$ , the fraction of O<sub>2</sub>  
44 evolution occurring in the bundle sheath;  $c$ , scaling constant for temperature dependence for  
45 parameters;  $CaL$ , Lower boundary CO<sub>2</sub> under which assimilation is limited by RuBP  
46 carboxylation and PEPc carboxylation;  $CaH$ , Higher boundary CO<sub>2</sub> above which  
47 assimilation is limited by RuBP regeneration and PEPc regeneration;  $C_{bs}$ , bundle sheath  
48 CO<sub>2</sub> concentration;  $C_i$ , intercellular CO<sub>2</sub> concentration;  $C_m$ , mesophyll CO<sub>2</sub> concentration;  
49  $\Delta H_a$ , energy of activation for temperature dependence for parameters;  $\Delta H_d$ , energy of  
50 deactivation for temperature dependence for parameters;  $\Delta S$ , entropy for temperature  
51 dependence for parameters;  $\phi_{PSII}$ , quantum yield;  $\gamma^*(25)$ , the specificity of Rubisco at 25°C;  
52  $g_{bs}$ , bundle sheath conductance for CO<sub>2</sub>;  $g_{bso}$ , bundle sheath conductance for O<sub>2</sub>;  $g_m$ ,  
53 mesophyll conductance for CO<sub>2</sub>;  $I$ , light intensity;  $J_{max}(25)$ , maximum rate of electron  
54 transport at 25°C;  $K_c(25)$ , Michaelis-Menten constant of Rubisco activity for CO<sub>2</sub> at 25°C;  
55  $K_o(25)$ , Michaelis-Menten constants of Rubisco activity for O<sub>2</sub>;  $K_p(25)$ , Michaelis-Menten  
56 constants of PEP carboxylation for CO<sub>2</sub>;  $O_{bs}$ , O<sub>2</sub> concentration in the bundle sheath cells;  
57  $Q_{10}$  for  $K_p$ , temperature sensitivity parameter for  $K_p$ ;  $R$ , the molar gas constant;  $R_d$ , daytime  
58 respiration;  $R_{dbs}$ , daytime respiration in bundle sheath cells;  $R_{dm}$ , daytime respiration in  
59 mesophyll cells; Rubisco, ribulose-1,5-bisphosphate carboxylase/oxygenase; RuBP,  
60 ribulose-1,5-bisphosphate;  $T_k$ , leaf absolute temperature;  $V_c$ , velocity of Rubisco

- 61 carboxylation;  $V_{\text{cmax}}(25)$ , maximal velocity of Rubisco carboxylation at 25°C;  $V_p$ , PEP
- 62 carboxylation;  $V_{\text{pc}}$ , PEPC reaction rate;  $V_{\text{pmax}}(25)$ , maximal PEP carboxylation rate at 25°C;
- 63  $V_{\text{pr}}$ , PEP regeneration rate;  $x$ , the maximal ratio of total electron transport could be used for
- 64 PEP carboxylation.
- 65

## 66 1. INTRODUCTION

67 Key photosynthetic parameters allow for the assessment of how biochemical and  
68 biophysical components of photosynthesis affect net carbon assimilation in response to  
69 environmental changes, phenotypic/genotypic differences, and genetic modification. The  
70 changes in net assimilation ( $A_n$ ) that occur along with the changes of intercellular  $\text{CO}_2$   
71 concentration ( $C_i$ )—or  $A/C_i$  curves—are widely used to estimate photosynthetic parameters  
72 for  $C_3$  species. In particular, the method by Sharkey et al. (2007), based on the  $C_3$   
73 photosynthesis model of Farquhar et al. (1980; FvCB model), has been one of the most  
74 widely used tools since it is based exclusively on  $A/C_i$  curves, which are easy to measure in  
75 both lab and field conditions.

76

77 Fewer estimates of photosynthetic parameters have been reported for  $C_4$  species, as there has  
78 been a lack of accessible  $C_4$  estimation methods. Several recent studies, however, used  $A/C_i$   
79 curves to estimate photosynthesis parameters based on the  $C_4$  photosynthesis model of von  
80 Caemmerer (2000) (Ubierna et al., 2013; Bellasio et al., 2015). These studies use partial  
81  $A/C_i$  curves; measuring assimilation rates for only a few  $\text{CO}_2$  concentrations coupled with  
82 ancillary measurements of chlorophyll fluorescence and/or 2%  $\text{O}_2$ . While these estimation  
83 methods lead to estimates of photosynthetic parameters, the additional measurements they  
84 require make estimation more cumbersome for field work or large-scale sampling.

85 Theoretically, it is possible to estimate photosynthetic parameters by exclusively fitting  $A/C_i$   
86 curves to a  $C_4$  photosynthesis model. In this paper, we propose the method to estimate  $C_4$   
87 photosynthesis parameters using only  $A/C_i$  curves.

88

89 There are several potential problems with  $A/C_i$ –based estimation methods for  $C_3$  plants that  
90 carry over to existing  $C_4$  methods (Gu et al. 2010); it is therefore important to develop a  $C_4$   
91 estimation method with improvements to solve the general problems and drawbacks outlined  
92 below. First, the structure of the FvCB model makes it easy to be over-parameterized.  
93 Second, a general shortcoming for the estimation methods is that they require an artificial  
94 assignment of the RuBP regeneration and Rubisco carboxylation limitation states to parts of  
95 the  $A/C_i$  curves (Xu and Baldocchi, 2003; Ethier et al., 2006; Ubierna et al., 2013; Bellasio  
96 et al., 2015), which has turned out to be problematic (Type I methods) (Gu et al. 2010).  
97 These methods assume constant transition points of limitation states for different species.  
98 Furthermore, Type I methods tend to minimize separate cost functions of different limitation  
99 states instead of minimizing a joint cost function. Some recent estimation methods for  $C_3$   
100 species ameliorate these problems by allowing the limitation states to vary at each iterative  
101 step of minimizing the cost function (Type II methods; Dubois et al., 2007; Miao et al.,  
102 2009; Yin et al., 2009; Gu et al., 2010). However, for these type II methods, additional  
103 degrees of freedom in these “auto-identifying” strategies can lead to over-parameterization if  
104 limitation states are allowed to change freely for all data points. Gu et al. (2010) also pointed  
105 out that existing Type I and Type II methods fail to check for inadmissible fits, which  
106 happen when estimated parameters lead to an inconsistent identification of limitation states  
107 from the formerly assigned limitation states. More specifically to  $C_4$ , the recently developed  
108  $C_4$  estimation methods artificially assign limitation states for  $A/C_i$  curves (Ubierna et al.,  
109 2013; Bellasio et al., 2015) and also did not check for inadmissible fits.  
110  
111 We developed methods to estimate photosynthetic parameters for  $C_4$  species based solely on

112 fitting intensive  $A/C_i$  curves to a  $C_4$  photosynthesis model (von Caemmerer, 2000). The  
113 intensive  $A/C_i$  curves ( $A/C_i$  curves with 6-8 more sampling points than the common  $A/C_i$  for  
114  $C_3$  species) are important for two reasons: First, at low  $C_i$ , the slope of  $A/C_i$  is very steep and  
115 the assimilation rate saturates quickly. Second,  $C_4$  species have more photosynthetic  
116 parameters as the carbon concentrating mechanism adds complexity. Additionally, carbonic  
117 anhydrase catalyzes the first reaction step for  $C_4$  photosynthesis (Jenkins et al., 1989), and it  
118 has been commonly assumed to not limit  $CO_2$  uptake in estimation methods and  $C_4$  models  
119 (von Caemmerer, 2000; Yin et al., 2011b). Recent studies, however, showed evidence of  
120 potential limitation by carbonic anhydrase (von Caemmerer et al., 2004; Studer et al., 2014;  
121 Boyd et al., 2015; Ubierna et al., 2017).

122

123 Therefore, first, we built estimation methods using two different fitting procedures of  
124 Sharkey et al. (2007) and Yin et al. (2011b) without considering carbonic anhydrase activity.  
125 Then, we add carbonic anhydrase limitation into the estimation method. We can also use this  
126 approach to examine how the carbonic-anhydrase-limitation assumption impacts parameter  
127 estimation, and whether the modeling of  $C_4$  photosynthesis can be simplified by omitting it.  
128 All together, our method estimates five to six photosynthesis parameters: (1) maximum  
129 carboxylation rate allowed by ribulose 1,5-bisphosphate carboxylase/oxygenase (Rubisco)  
130 ( $V_{cmax}$ ), (2) rate of photosynthetic electron transport ( $J$ ), (3) day respiration ( $R_d$ ), (4)  
131 maximal PEP carboxylation rate ( $V_{pmax}$ ), (5) mesophyll conductance ( $g_m$ ), and optionally (6)  
132 the rate constant for carbonic anhydrase hydration activity ( $k_{CA}$ ). These approaches yield the  
133 following improvements to eliminate common problems occurring in the previous  $C_3$  and  $C_4$   
134 estimation methods: avoiding over-parameterization, maximizing joint cost function, freely

135 determining transition points instead of assigning in advance, and checking for inadmissible  
136 fits. Second, since both RuBP regeneration and PEP regeneration need ATP (Hatch, 1987),  
137 we also examine two different assumptions about ATP distribution between RuBP  
138 regeneration and PEP regeneration in  $C_4$  photosynthesis models. Third, we validate the  
139 estimation methods in four independent ways, using: (i) simulation tests using  $A/C_i$  curves  
140 generated using our model with known parameters and adding random errors, (ii) out of  
141 sample test, (iii) existing in vitro measurements and (iv) Chlorophyll fluorescence  
142 measurement. Finally, we used the  $C_4$  photosynthesis model to perform sensitivity analyses  
143 and simulation analyses for important physiological input parameters. These analyses allow  
144 us to illustrate the underlying physiological significance of these parameters to the ecology  
145 and evolution of the  $C_4$  photosynthesis pathway.

146

## 147 **2. MATERIALS and METHODS**

### 148 **2.1 $C_4$ Mechanism**

149 The  $CO_2$  concentrating mechanism of  $C_4$  pathway increases  $CO_2$  in the bundle sheath cells  
150 to eliminate photorespiration. Like the  $C_3$  pathway, the diffusion of  $CO_2$  starts from the  
151 ambient atmosphere through stomata into intercellular spaces, and then into the mesophyll  
152 cells. In the mesophyll cells, the first step is the hydration of  $CO_2$  into  $HCO_3^-$  by carbonic  
153 anhydrase. PEPC, then, catalyze  $HCO_3^-$  and PEP into  $C_4$  acids and the  $C_4$  acids are  
154 transported to the bundle sheath cells. In the bundle sheath cell,  $C_4$  acids are decarboxylated  
155 to create a high  $CO_2$  environment for the  $C_3$  photosynthetic cycle, and PEP is regenerated.  
156 All the modeling equations and mechanistic processes used for our estimation method are  
157 from von Caemmerer (2000), Hatch and Burnell (1990), Boyd et al. (2015) and Ubierna et



158 al. (2017) (Supplementary Methods).

159

160 Given the two limitation states of C<sub>4</sub> cycle (PEP carboxylation ( $V_{pc}$ ) and PEP Regeneration  
161 ( $V_{pr}$ )), and two limitation states of C<sub>3</sub> cycle (RuBP carboxylation ( $A_c$ ) and RuBP  
162 Regeneration ( $A_j$ )) in the C<sub>4</sub> photosynthesis model, there are four combinations of limitation  
163 states (as Yin et al., 2011b, Fig. 1): RuBP carboxylation and PEP carboxylation limited  
164 assimilation (AEE), RuBP carboxylation and PEP regeneration limited assimilation (ATE),  
165 RuBP regeneration and PEP carboxylation limited assimilation (AET) and RuBP  
166 regeneration and PEP regeneration limited assimilation (ATT). Since the C<sub>4</sub> cycle operates  
167 before the C<sub>3</sub> cycle and provides substrates for the C<sub>3</sub> cycle, the determination process of  $A_n$   
168 is as follows:

169 If ( $V_{pc} < V_{pr}$ ),  $A_c = AEE$ ,  $A_j = AET$ , otherwise  $A_c = ATE$ ,  $A_j = ATT$  (1)

170  $A_n = \min(A_c, A_j)$ , (2)

171 which we used for our estimation method.

172

## 173 2.2 Plant Material

174 We performed intensive  $A/C_i$  curves on nine different C<sub>4</sub> species to develop and examine the  
175 efficacy of our estimation tools: *Zea mays* L., *Eragrostis trichodes* (Nutt.) Alph. Wood,  
176 *Andropogon virginicus* L., *Schizachyrium scoparium* (Michx.) Nash, *Panicum virgatum* L.,  
177 *Panicum amarum* Elliott, *Setaria faberi* Herrm., *Sorghastrum nutans* (L.) Nash  
178 and *Tripsacum dactyloides* (L.) L. The intensive  $A/C_i$  curves contain more sample points  
179 under more CO<sub>2</sub> concentrations than the default curve used for C<sub>3</sub> species. Here we set the  
180 CO<sub>2</sub> concentrations as 400, 200, 50, 75, 100, 125, 150, 175, 200, 225, 250, 275, 300, 325,

181 350, 400, 500, 600, 700, 800, 1000, 1200, 1400 ppm under light intensity of  $1500 \mu\text{molm}^{-2}\text{s}^{-1}$   
182 <sup>1</sup> (light intensity encountered by the plants in greenhouse). At each point, data was recorded  
183 when the intercellular  $\text{CO}_2$  concentration equilibrated within 2-5 minutes. The datasets were  
184 obtained using a standard  $2 \times 3 \text{ cm}^2$  leaf chamber with a red/blue LED light source of LI-  
185 6400 (LI-COR Inc., Lincoln, NE, USA). If the stomatal conductance of a species does not  
186 decrease quickly at high  $\text{CO}_2$ , then the sample points at the high  $\text{CO}_2$  level can be increased.  
187 Fluorescence was measured along with  $A/C_i$  curves for seven  $\text{C}_4$  species ( $\text{CO}_2$  concentration  
188 is similar with above). After each change of  $\text{CO}_2$  concentration and  $A$  reached steady state,  
189 the quantum yield was measured by multiphase flash using a  $2 \text{ cm}^2$  fluorescence chamber  
190 head (Bellasio et al., 2014). All the measurements are conducted at  $25^\circ\text{C}$  and VPD is  
191 controlled at 1-1.7kPa. The cuvette was covered by Fun-Tak to avoid and correct for the  
192 leakiness (Chi et al., 2013).

193

### 194 **2.3 Estimation Protocol**

195 We implemented the estimation methods using the non-linear curve-fitting routine in MS  
196 Excel (Supplementary Material I, II, III) and independently in R (“C4Estimation”) to get  
197 solutions that minimize the squared difference between observed and predicted assimilation  
198 rates ( $A$ ). Five (or six when considering carbonic anhydrase) parameters will be estimated by  
199 fitting the  $A/C_i$  curve:  $V_{\text{cmax}}$ ,  $J$ ,  $R_d$ ,  $V_{\text{pmax}}$ ,  $g_m$ , and  $k_{\text{CA}}$ . Other input parameters for  $\text{C}_4$  are in  
200 Table S1.

201

202 **Input data sets and preliminary calculations.** The input data sets are the leaf temperature  
203 during measurements, atmosphere pressure, two  $\text{CO}_2$  bounds ( $CaL$  and  $CaH$  discussed in the

204 following section), and the assimilation rates ( $A$ ) and the  $C_i$ s (in ppm) in the  $A/C_i$  curve.

205 Also, reasonable initial values of output parameters need to be given in the output section to

206 initiate the non-linear curve fitting (Supplementary Material IV).  $C_i$  will be adjusted from

207 the unit of ppm to the unit of Pa inside the program as suggested by Sharkey et al. (2007).

208

209 **Estimating limitation states.** We set upper and lower limits to the value of  $C_i$  between

210 which the assimilation rates are freely determined by limitation states. Also, we can avoid

211 over-parameterization by pre-assigning limitation states at the lower and upper ends of the

212  $C_i$  range. We assumed that under very low  $C_i$  ( $CaL$ ),  $CO_2$  is the limiting substrate; thus,  $V_p$  is

213 limited by  $V_{pc}$  and  $A$  is given by  $A_c$  (AEE); under very high  $C_i$  ( $CaH$ ) electron transport is

214 limiting, thus,  $V_p$  is limited by  $V_{pr}$  and  $A$  is given by  $A_j$  (ATT) (Fig. 1). The points between

215  $CaL$  to  $CaH$  are freely determined by AEE, ATE, AET or ATT from eq. (16) and (17) to

216 minimize the cost function. We suggest setting  $CaL$  as 10 Pa initially, then adjusting based

217 on the preliminary results. The points of constant  $A$  at high  $C_i$  end can initially be set as

218 being limited by ATT primarily (based on the three points, we can  $CaH$ ) or use 65 Pa as the

219 first trial. The range of freely determined points can be adjusted by users by setting

220 appropriate  $CaL$  and  $CaH$ . In the column of “Estimate Limitation”, whether the data points

221 are limited by AEE (represented by “1”), ATT (represented by “4”) or freely vary

222 (represented by “0”), all the assignments of “1”, “4” and “0” are determined automatically

223 by the given values of  $CaL$  and  $CaH$ . One can input “-1” to disregard a data pair. Users can

224 adjust limitation states according to how many points and the range of  $C_i$  they have in their

225  $A/C_i$  curves.

226

227 We assume different processes in the  $C_4$  photosynthesis are coordinated with each other and  
228 co-limit the assimilation rate (Sharkey et al., 2007; Yin et al., 2011b; Ubierna et al., 2013;  
229 Bellasio et al., 2015). Thus, the estimation parameters allow the limitation states to be  
230 compactly clustered with each other (Fig. 1). However, if there were only a few points under  
231  $CaL$ , the estimation results will depend heavily on the given initial values and unbalanced  
232 results would be more likely. Fig. S1 shows an example of unbalanced estimation results by  
233 deleting some points under 10 Pa or setting a very low  $CaL$ : in the estimation results,  $A_n$  is  
234 limited by  $AEE$  at very low  $C_i$  and is mostly limited by  $A_j$  (shown by AET and ATT) in the  
235  $C_3$  cycle. In this case,  $A_c$  (shown by AEE and ATE) has a clear redundancy at higher  $C_i$ .  
236 Unbalanced results happened when there are not enough constraints points under  $CaL$  or  
237 above  $CaH$ . Such results explain why intensive  $A/C_i$  curves are preferred, especially more  
238 measuring points under the lower end and higher end of  $C_i$ . However, existing  $A/C_i$  data  
239 with 14 points might be used in the current estimation method if there are at least four points  
240 below  $CaL$  and three points above  $CaH$ .

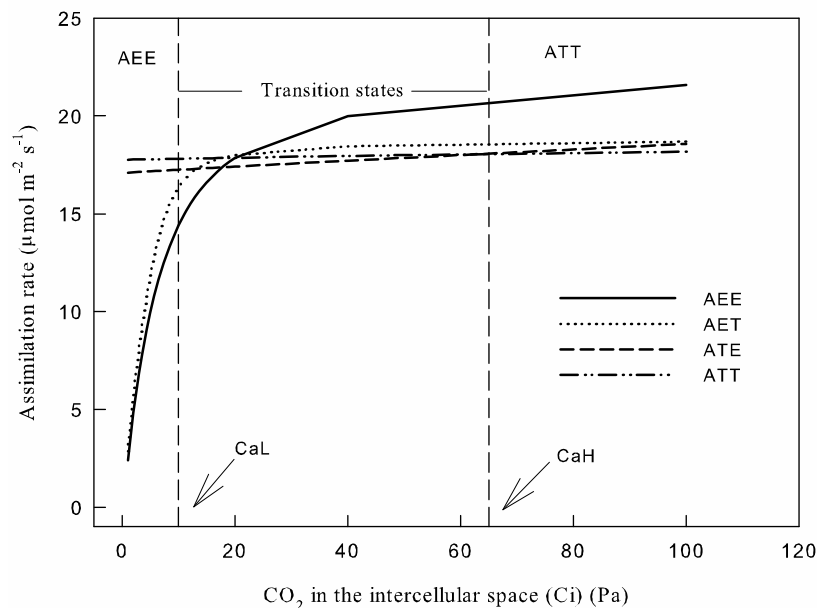

242 **Fig. 1** An introduction of how our estimation methods assign transition points between limitation  
243 states. AEE represents RuBP carboxylation, and PEP carboxylation limited assimilation rate, ATT  
244 represents RuBP regeneration and PEP regeneration limited assimilation rate. Transition states  
245 indicate assimilation could be limited by AEE, ATT, ATE (RuBP carboxylation and PEP  
246 regeneration) and AET (RuBP regeneration and PEP carboxylation). Our algorithm allows the  
247 transition states to be freely limited by the above four conditions from a lower bound ( $CaL$ , 10 Pa for  
248 instance) and a higher bound ( $CaH$ , 65 Pa for example), indicated by the dashed vertical lines in the  
249 figure.

250

251 **Estimation algorithm and fitting procedures.** The objective of our estimation methods is  
252 to minimize the following joint cost function (eq. 3 and 4) by varying the above five or six  
253 output parameters ( $V_{cmax}$ ,  $J$ ,  $R_d$ ,  $V_{pmax}$ ,  $g_m$ , and  $k_{CA}$ ):

$$f = \sum_{i=1}^n (A_i - A_{mi})^2. \quad (3)$$

254

$$A_i = [If(C_i \leq CaL), AEE; If(C_i \geq CaH), ATT; IF(CaL \leq C_i \leq CaH), \min(A_{ci}, A_{ji})] \quad (4)$$

255

256  $n$  is the total number of observations,  $A_{ci}$  is determined by AEE and ATE and  $A_{ji}$  is  
257 determined by AET and ATT from eq. (1),  $A_{mi}$  is the observed net assimilation rate.

258 In this calculation, we take Michaelis-Menten constant of Rubisco activity for  $CO_2$  ( $K_c$ ),  
259 Michaelis-Menten constant of Rubisco activity for  $O_2$  ( $K_o$ ), the specificity of Rubisco ( $\gamma^*$ ),  
260 Michaelis-Menten constants of PEP carboxylation for  $CO_2$  or  $HCO_3^-$  ( $K_p$ ), the fraction of  $O_2$   
261 evolution occurring in the bundle sheath ( $\alpha$ ) and bundle sheath conductance ( $g_{bs}$ ) as given  
262 (input parameters), similar to Sharkey et al. (2007). We conduct further sensitivity analyses  
263 in the following section to determine the effects of variability of these inputs parameters on  
264 the estimation results.

265

266 We used two fitting procedures in the current study: one was from Sharkey et al. (2007),  
267 which is an implicit minimization of error (Supplementary Material I, III), and the other one  
268 was based on the explicit calculations given by Yin et al. (2011b) (Supplementary Material  
269 II). For the method of Sharkey et al. (2007), "estimated"  $A_n$  was calculated using the above  
270 equations and observed  $A_n$  values. We call them "estimated", because when we calculate  $A_n$ ,  
271 observed  $A_n$  is used to calculate intermediate parameters, for example, the  $\text{CO}_2$   
272 concentration in mesophyll cells ( $C_m$ ), the  $\text{CO}_2$  concentration in bundle sheath ( $C_{bs}$ ), which  
273 we then use to calculate  $A_c$  and  $A_j$ . The objective function is to minimize the sum of square  
274 errors between "estimated"  $A_n$  and observed  $A_n$  (Simulation Error in Supplementary Material  
275 I, III). For the model without carbonic anhydrase, Yin et al. (2011b) gave explicit solutions  
276 for AEE, ATE, AEE, and ATT). "Explicit" here means the assimilation rates are totally  
277 calculated by the estimated parameters without calculating the intermediates with observed  
278  $A_n$ . These calculations give us the real estimation error of our fitting procedure for models  
279 without carbonic anhydrase and thus provide a validation for the goodness of fit ("True  
280 Error" in Supplementary Material I-III).

281

282 **Checking inadmissible fits.** We made it possible to check the inadmissible fits for  
283 limitation states in our estimation method. After the estimation process finishes, the  
284 limitation states based on the estimated parameters will be calculated in the last column. If  
285 the calculated limitation states are inconsistent with the assigned ones in the estimation  
286 method, one needs to readjust the assignment of the "Estimate Limitation" (adjust  $CaL$  or  
287  $CaH$ ) and rerun the estimation method, until they are consistent with each other.

288

## 289 **3. RESULTS**

### 290 **3.1 Estimation results and assumptions**

291 Estimation methods based on assumptions with and without carbonic anhydrase yield  
292 similar results (Supplementary material V). In Supplementary material III, carbonic  
293 anhydrase indeed shows limitation to  $V_{pc}$ , which confirms its potential role as a limiting step  
294 in the  $C_4$  cycle. However,  $V_{pc}$  calculated from  $CO_2$  are only a little higher than  $V_{pc}$  calculated  
295 from  $HCO_3^-$ , which resulted in the similar estimation results. In addition, the estimation  
296 errors and true errors from Yin's equations are quite small (average < 1), and also similar  
297 between models with and without carbonic anhydrase.

298

299 Estimation methods based on the two equations of different assumptions about electron  
300 transport between RuBP regeneration and PEP regeneration yield consistent parameter  
301 estimates and assimilation-  $CO_2$  response curves (Fig. 2), but there were minor differences.  
302 The second assumption that ATP, resulting from electron transport, is freely allocated  
303 between PEP carboxylation-regeneration and RuBP regeneration leads to a bump at low  
304  $CO_2$  when estimating ATE. The two assumptions produce different ATE under low  $CO_2$ ; but  
305 this is largely inconsequential because, under low  $CO_2$ , assimilation is usually limited by  
306 AEE.

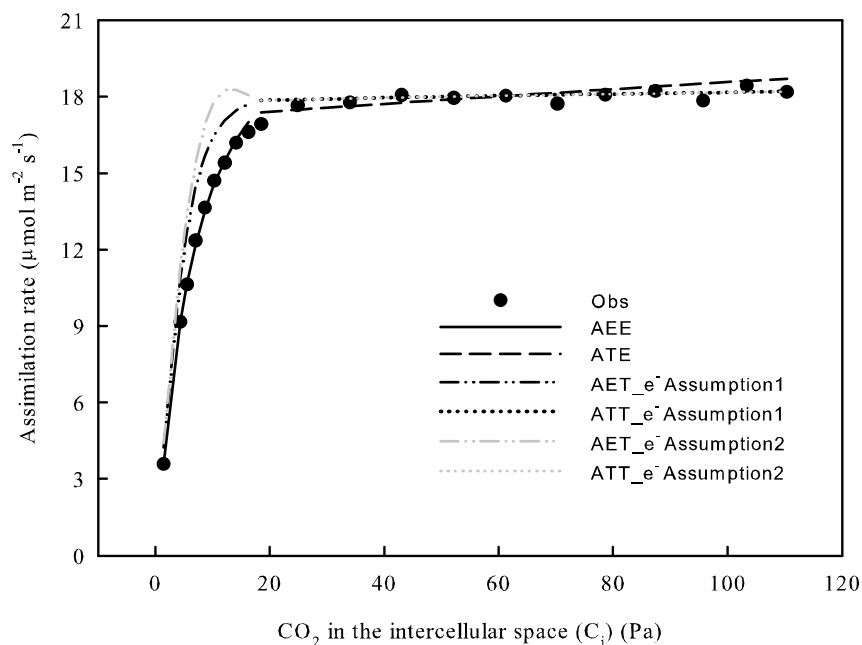

307

308 **Fig. 2** Assimilation- $\text{CO}_2$  response curves ( $A/C_i$ ) generated using  $\text{C}_4$  photosynthesis of two different  
 309 assumptions about electron transport. Photosynthetic parameters ( $V_{\text{cmax}}$ ,  $J$ ,  $R_d$ ,  $V_{\text{pmax}}$ , and  $g_m$ ) are the  
 310 same for both assumptions.  $\text{AET}_{\text{e}^-}$  Assumption1 and  $\text{ATT}_{\text{e}^-}$  Assumption1 represent results of the  
 311 assumption that no matter how much electron transport is used for PEP carboxylation/regeneration, a  
 312 certain amount ( $xJ$ ) is confined for this use.  $\text{AET}_{\text{e}^-}$  Assumption2 and  $\text{ATT}_{\text{e}^-}$  Assumption2 represent  
 313 results of the assumption that electron transport can be freely distributed between PEP  
 314 carboxylation/regeneration and RuBP regeneration. Parameters are estimated from  $A/C_i$  curve of *T.*  
 315 *dactyloides* under the light intensity of  $1500 \mu\text{mol m}^{-2} \text{s}^{-1}$ . AEE and ATE are the same for both  
 316 assumptions.

317

### 318 3.2 Sensitivity analysis

319 The parameters  $K_c$ ,  $K_o$ ,  $\gamma^*$ ,  $K_p$ ,  $\alpha$ , and  $g_{\text{bs}}$  can vary among species in nature (Cousins et al.,  
 320 2010) and it is therefore important to know how sensitive our results are to variation in these  
 321 parameters. We conducted a sensitivity analysis for variation in these parameters on the



322 estimated  $V_{\text{cmax}}$ ,  $J$ ,  $R_d$ ,  $V_{\text{pmax}}$ ,  $g_m$  and  $k_{\text{CA}}$  (Fig. 3). This analysis shows all the estimated  
323 parameters are robust under the variation of  $\alpha$  (Fig. 3A) and showed little variation  
324 responding to the change of  $\gamma^*$  (Fig. 3E) and  $K_o$  (Fig. 3C); however, the estimated  
325 parameters are dependent on the other input parameters to different extents (Fig. 3B, D, F).  
326 We calculate the average percentage change of estimated parameters along with the 50 %  
327 decrease and 100 % increase of the input parameters.  $V_{\text{cmax}}$  showed some medium extent of  
328 sensitivity for  $K_c$ ,  $K_p$ , and  $g_{\text{bs}}$  with the average percentage change of 23.11, 7.54 and 17.69 %  
329 respectively.  $J$  is robust in the variations of  $K_c$ , and  $g_{\text{bs}}$  (the average change is less than 2%)  
330 and with a medium 6.96 % change for  $K_p$ .  $k_{\text{CA}}$  is robust in the variations of  $K_c$ ,  $K_p$ , and  $g_{\text{bs}}$   
331 (average change less than 5%).  $V_{\text{pmax}}$  is sensitive for  $K_p$  with the average change of 27.34%,  
332 moderately sensitive to the change of  $g_{\text{bs}}$  with 4.01 % and 13.38% change and is robust for  
333  $K_c$ .  $R_d$  is sensitive to  $K_c$ ,  $K_p$ , and  $g_{\text{bs}}$  with the change of 6.73, 43.88 and 13.38%.  $g_m$  is  
334 strongly sensitive to  $K_c$ ,  $K_p$ , and  $g_{\text{bs}}$  with the average percentage changes of 22.95, 107.04  
335 and 23.19 %. This results suggest that  $V_{\text{cmax}}$ ,  $J$ ,  $V_{\text{pmax}}$ , and  $k_{\text{CA}}$  estimated using our method  
336 are relatively robust.

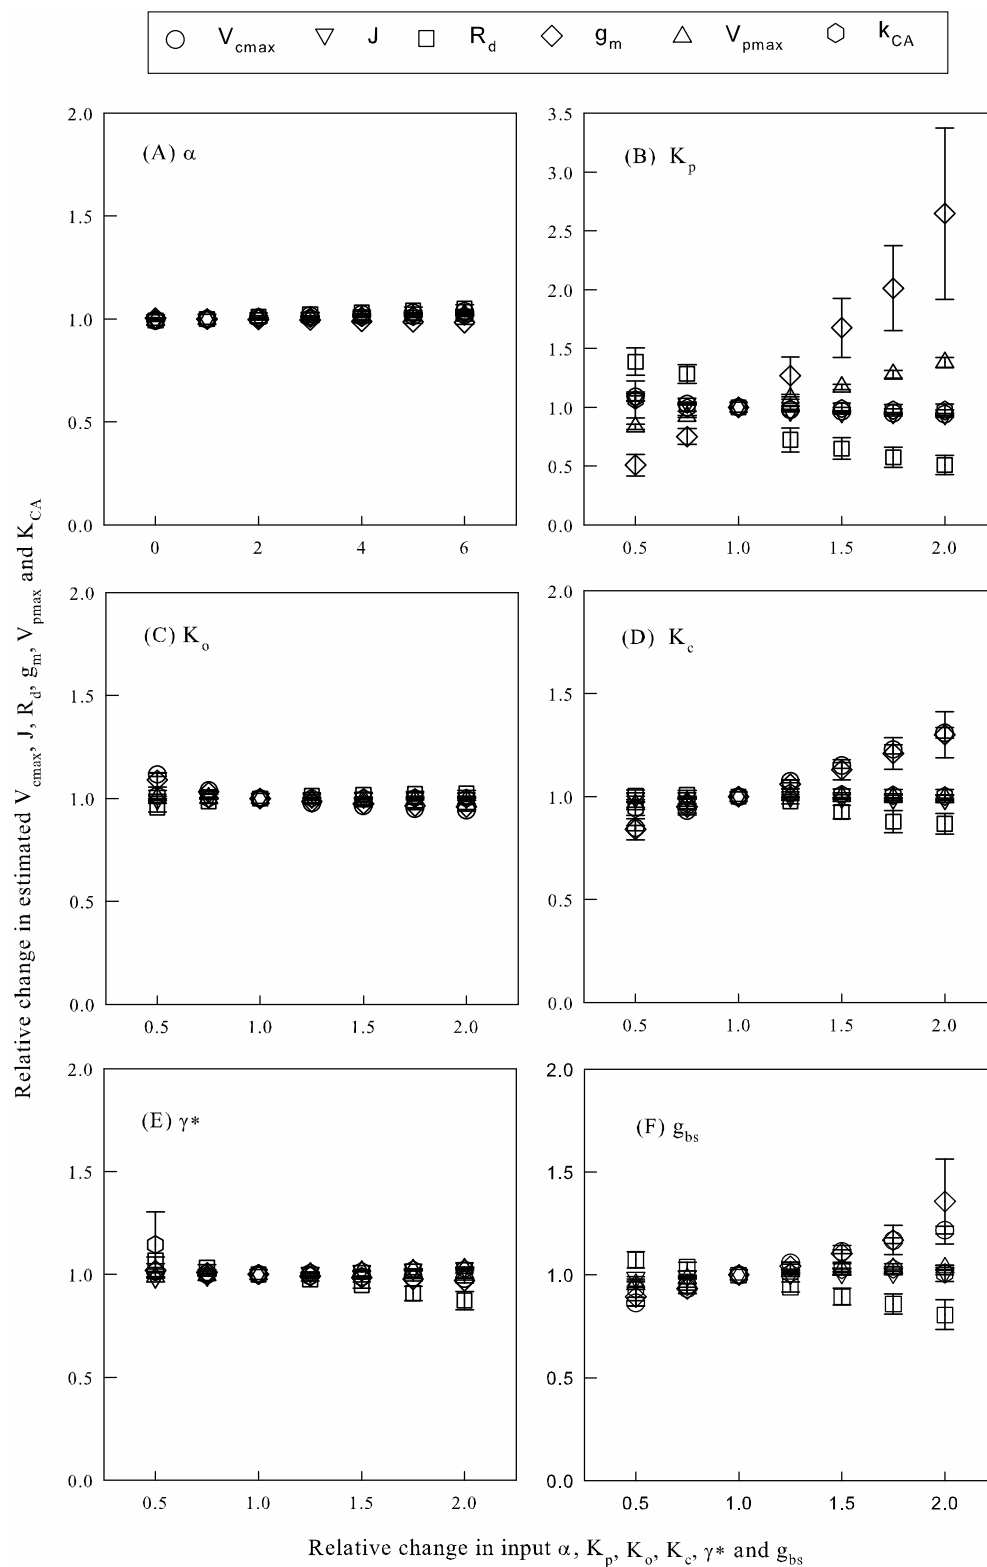

337

338 **Fig. 3** Sensitivity analysis of six estimation parameters to the variation in six input parameters using

339 the model with carbonic anhydrase. Relative changes in the estimated  $V_{cmax}$ ,  $J$ ,  $R_d$ ,  $V_{pmax}$ ,  $g_m$  and  $k_{CA}$

340 in response to the relative change of six input parameters [(A)  $\alpha$ , (B)  $K_p$ , (C)  $K_o$ , (D)  $K_c$ , (E)  $\gamma^*$  and  
341 (F)  $g_{bs}$ ] from the initial values in Table S1. The relative change of estimated parameters refers to the  
342 ratio of estimated values at a changed input parameter to the estimated value at the initial value of  
343 that input parameter. The symbols represent the average change of the nine  $C_4$  species and error bars  
344 represent standard error.

345

### 346 **3.3 Physiological significance for assimilation rate of the input parameters**

347 In addition to the sensitivity analysis, we performed a simulation analysis to illustrate the  
348 physiological importance of input parameters further, and to indicate further the importance  
349 of physiological properties in maintaining the efficiency of  $C_4$  photosynthesis pathway. We  
350 chose the estimation parameter set of *T. dactyloides* as an example, held photosynthetic  
351 parameters constant  $V_{cmax}$  ( $28 \mu\text{mol m}^{-2} \text{s}^{-1}$ ),  $J$  ( $134 \mu\text{mol m}^{-2} \text{s}^{-1}$ ),  $R_d$  ( $0.78 \mu\text{mol m}^{-2} \text{s}^{-1}$ ),  $g_m$   
352 ( $30.00 \mu\text{mol m}^{-2} \text{s}^{-1} \text{Pa}^{-1}$ ) and  $V_{pmax}$  ( $41.91 \mu\text{mol m}^{-2} \text{s}^{-1}$ ), while changing the values of  $\alpha$ ,  $\gamma^*$ ,  
353  $g_{bs}$ , and  $K_p$  (as half or twice of the original parameters) to see their effects on the  
354 assimilation rate,  $C_{bs}$  and the  $O_2$  concentration in bundle sheath ( $O_{bs}$ ) (Fig. 4, Table 1).

355 Using photosynthetic parameter sets of other species to perform the simulation analysis  
356 yielded similar results (data not shown). The change of  $\alpha$  did not lead to changes in  
357 assimilation rate (Fig. 4A) and led to small changes in  $O_{bs}$  (Table 1). The decrease of  $\gamma^*$  to  
358 half of the current value led to a small change of  $C_{bs}$  and assimilation rate (less than  $0.5$   
359  $\mu\text{mol m}^{-2} \text{s}^{-1}$ ) while doubling  $\gamma^*$  led to a larger, but still not significant, change (less than  $1$   
360  $\mu\text{mol m}^{-2} \text{s}^{-1}$ ) (Fig. 4B, Table 1). Importantly, the changes of assimilation rates were less  
361 than  $0.3 \mu\text{mol m}^{-2} \text{s}^{-1}$  when  $C_i$  was less than 20 Pa, which is the regular range of  $C_i$  under  
362 current ambient  $CO_2$ . However, the change of  $g_{bs}$  significantly changed the assimilation rate

363 and  $C_{bs}$  (Fig. 4C, Table 1). The change of  $K_p$  significantly affected the assimilation rate and  
 364  $C_{bs}$  to a large degree under low  $C_i$  (Fig. 4D, Table 1).

365

366 **Table 1** The average change of percentage of  $CO_2$  concentration ( $C_{bs}$ ) and  $O_2$  concentration at  
 367 bundle sheath ( $O_{bs}$ ) compared to the reference value of  $\alpha_0$ ,  $\gamma^*_0$ ,  $g_{bs0}$  and  $K_p$ . Simulation results are  
 368 obtained by using the original parameter set of *T. dactyloides* with  $V_{cmax} = 28 \mu\text{mol m}^{-2} \text{s}^{-1}$ ,  $J = 134$   
 369  $\mu\text{mol m}^{-2} \text{s}^{-1}$ ,  $R_d = 0.78 \mu\text{mol m}^{-2} \text{s}^{-1}$ ,  $g_m = 30.00 \mu\text{mol m}^{-2} \text{s}^{-1} \text{Pa}^{-1}$  and  $V_{pmax} = 41.91 \mu\text{mol m}^{-2} \text{s}^{-1}$ . The  
 370 values represent average change of percentage of 21 values from 0-120 Pa of intercellular  $CO_2$  ( $C_i$ )  
 371 (data show mean (standard error)).

| Parameters            | $\alpha = 0$           | $\alpha = 2 \alpha_0$ | $\gamma^* = 0.5 \gamma^*_0$ | $\gamma^* = 2 \gamma^*_0$ |
|-----------------------|------------------------|-----------------------|-----------------------------|---------------------------|
| Chang of $C_{bs}$ (%) | -0.91(0.06)            | 0.97(0.06)            | -2.96(0.28)                 | 5.05(0.49)                |
| Chang of $O_{bs}$ (%) | -6.07(0.30)            | 6.01(0.30)            | 0.07(0.01)                  | -0.21(0.02)               |
| Parameters            | $g_{bs} = 0.5 g_{bs0}$ | $g_{bs} = 2 g_{bs0}$  | $K_p = 0.5 K_{p0}$          | $K_p = 2 K_{p0}$          |
| Chang of $C_{bs}$ (%) | 56.99(3.03)            | -29.48(0.41)          | 43.12(10.75)                | -36.57(4.07)              |
| Chang of $O_{bs}$ (%) | 6.77(0.29)             | -3.41(0.16)           | 0.91(0.18)                  | -1.18(0.14)               |

372

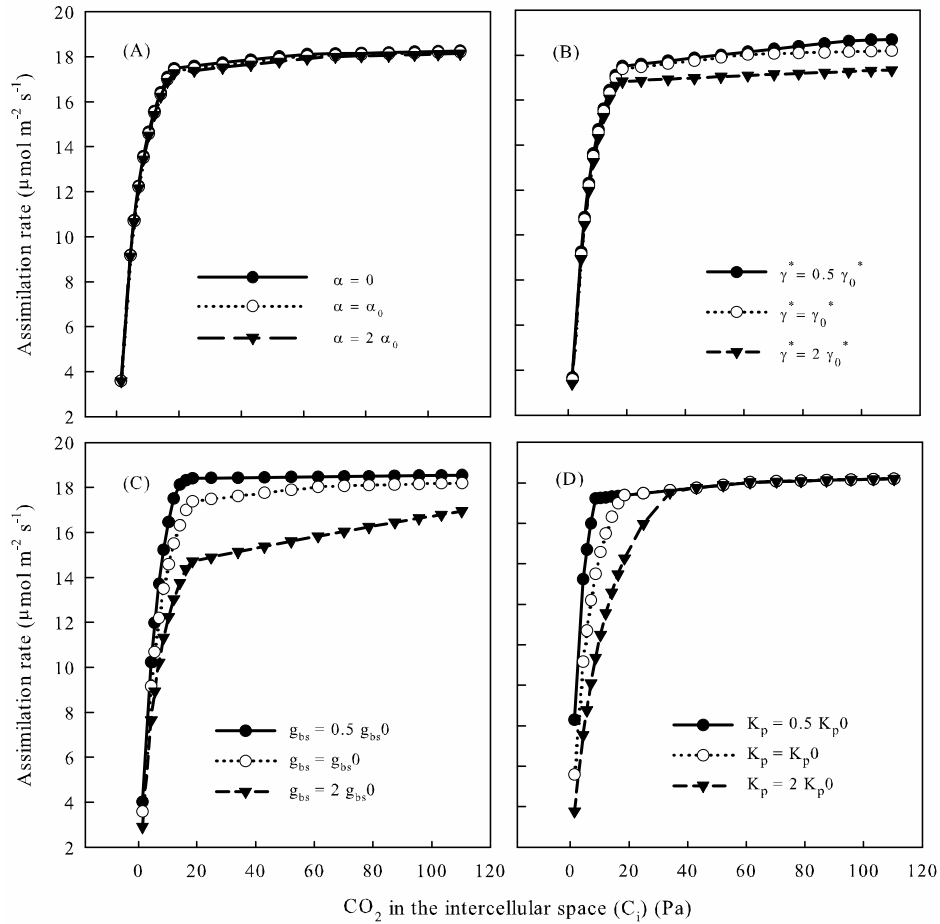

373

374 **Fig. 4** Simulation results of assimilation rate along with different intercellular CO<sub>2</sub> concentration (C<sub>i</sub>)

375 with the known photosynthetic parameters, but with the change of (A)  $\alpha$ , (B)  $\gamma^*$ , (C)  $g_{bs}$  and (D)  $K_p$ .

376 The original data set are  $V_{cmax} = 28 \mu\text{mol m}^{-2} \text{s}^{-1}$ ,  $J = 134 \mu\text{mol m}^{-2} \text{s}^{-1}$ ,  $R_d = 0.78 \mu\text{mol m}^{-2} \text{s}^{-1}$ ,  $g_m =$

377  $30.00 \mu\text{mol m}^{-2} \text{s}^{-1} \text{Pa}^{-1}$  and  $V_{pmax} = 41.91 \mu\text{mol m}^{-2} \text{s}^{-1}$ . The reference value of changing parameters at

378  $25^\circ\text{C}$ :  $\alpha(25) = 0.15$ ,  $\gamma^*(25) = 0.000244$ ,  $g_{bs}(25) = 0.0295$  and  $K_p(25) = 8.55 \text{ Pa}$ .

379

### 380 **3.4 Validating the estimation methods**

381 In order to test our estimation methods, we first conducted a simulation test with

382 manipulated error terms. We use the estimated results of the nine species as known

383 parameters (the known values in Fig. 5) to generate new datasets using the C<sub>4</sub>

384 photosynthesis equations based the first assumption of electron transport and adding error  
385 terms to the assimilation rates. The error terms were randomly drawn from a normal  
386 distribution of mean zero and standard deviation of 0.1 or 0.2 in an effort to simulate the  
387 inevitable random errors in the real measurements. Estimating simulated data sets gave us an  
388 idea about how likely we can capture the real parameters of the species given unavoidable  
389 errors in measurements. The results show that robust estimation results for  $V_{\text{cmax}}$ ,  $J$ ,  $V_{\text{pmax}}$ ,  
390 and  $R_{\text{d}}$  can be obtained (Fig. 5A, B, C, D). However, some estimation results of  $g_{\text{m}}$  and  $k_{\text{CA}}$   
391 show some deviation from the real values (Fig. 5E, F).

392

393 To test whether our estimation method could give accurate predictions across typical  
394 prediction scenarios, ( $\text{CO}_2$  ranging from 20 Pa to 60 Pa), we performed out of sample tests  
395 for our nine target species. To perform these tests, we removed five points of  $\text{CO}_2$   
396 concentrations between 20 and 60 Pa range out of the  $A/C_i$  curves and used the rest of the  
397  $A/C_i$  curves to estimate parameters. And then we used these parameters to predict the  
398 assimilation rate under the  $\text{CO}_2$  concentrations we took out before and calculated the  
399 estimation errors. In general, the estimation errors for all our species were small (Table 2).

400

401 **Table 2** Out of sample test results. Five measured points from 20 Pa-60 Pa were taken out when we  
402 conducted the estimation process. Then the calculated assimilation rates under these five  $\text{CO}_2$   
403 concentrations were compared with the measured ones. The data shows estimated error between the  
404 calculated and measured assimilation rates (data show mean (standard error)).

| Species          | <i>A. virginicus</i> | <i>Z. mays</i> | <i>E. trichodes</i> | <i>P. virgatum</i> | <i>P. amarum</i> |
|------------------|----------------------|----------------|---------------------|--------------------|------------------|
| Model without CA | 0.069(0.036)         | 0.150(0.056)   | 0.035 (0.017)       | 0.193(0.063)       | 0.055(0.034)     |
| Model with CA    | 0.066(0.043)         | 0.154(0.057)   | 0.111 (0.058)       | 0.195 (0.061)      | 0.054(0.033)     |

| Species          | <i>S. scoparium</i> | <i>S. faberi</i> | <i>S. nutans</i> | <i>T. dactyloides</i> |
|------------------|---------------------|------------------|------------------|-----------------------|
| Model without CA | 0.023(0.010)        | 0.114(0.055)     | 0.258(0.080)     | 0.199(0.090)          |
| Model with CA    | 0.105(0.034)        | 0.068(0.040)     | 0.263(0.133)     | 0.200(0.090)          |

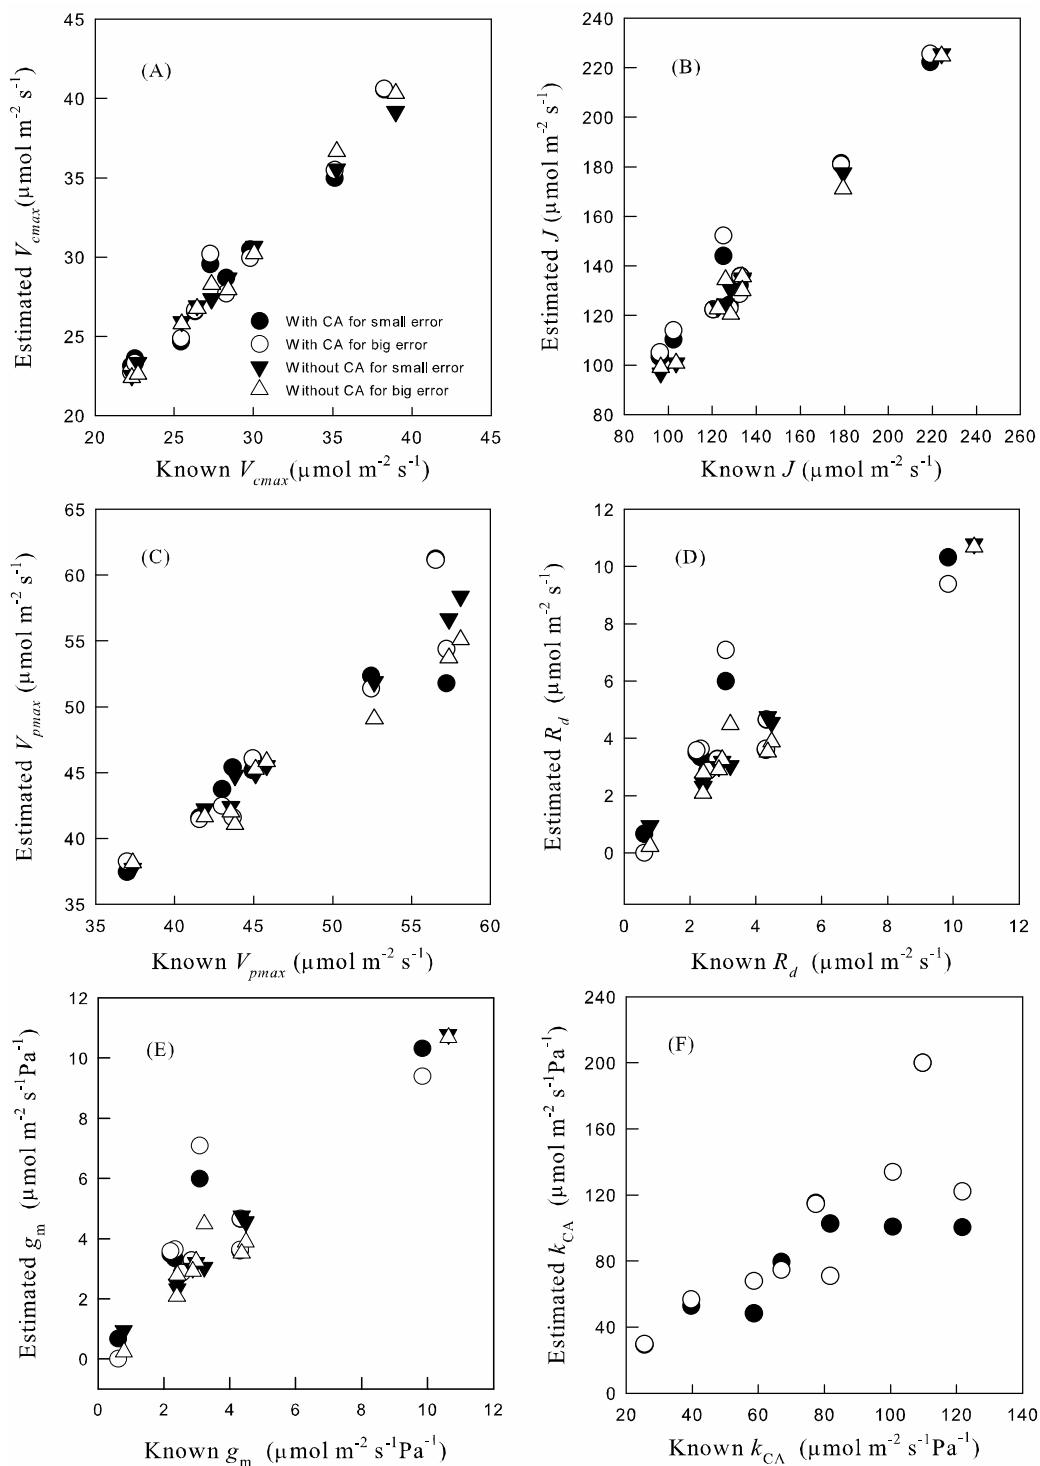

408

409 **Fig. 5** Simulation tests for the estimated parameters ((A)  $V_{\text{cmax}}$ , (B)  $J$ , (C)  $V_{\text{pmax}}$ , (D)  $R_{\text{d}}$ , (E)  $g_{\text{m}}$  and  
410 (F)  $k_{\text{CA}}$ ) using estimation methods with and without carbonic anhydrase reaction (With CA and  
411 Without CA). Datasets are generated by adding random errors for the modeling results using the  
412 known photosynthesis parameters of nine species. These known photosynthesis parameters are the  
413 true values in the x-axis and are used to compare with the newly estimation parameters. The small  
414 error refers to error term randomly chosen with mean 0 and standard deviation of 0.1 and the bigger  
415 error refers to error term with randomly chosen mean 0 and standard deviation of 0.2.

416

417 We tried to compare our estimation methods with in vitro measurements or other estimation  
418 methods using isotopic analysis, especially for *Zea*. Our estimation results for *Zea* obtained  
419 similar  $V_{\text{cmax}}$  with the in vitro estimated Rubisco activity of Pinto et al. (2014); however, the  
420 estimated value for  $V_{\text{pmax}}$  is a little lower than the in vitro PEPC activity measurement with a  
421 difference of around  $10 \mu\text{mol m}^{-2} \text{s}^{-1}$ . For species of the Panicum family with NAD-ME  
422 subtype, *P. virgatum* and *P. amarum* in the current study and *P. coloratum* in Pinto et al.  
423 (2014), the estimated  $V_{\text{cmax}}$  and  $V_{\text{pmax}}$  are quite consistent with the in vitro measurements.  
424 Ubierna et al. (2017) reported the  $g_{\text{m}}$  for *Zea* ranged from  $1.69 \pm 0.17$  to  $8.19 \pm 0.80 \mu\text{mol}$   
425  $\text{m}^{-2} \text{s}^{-1} \text{Pa}^{-1}$  using  $^{18}\text{O}$  and in vitro  $V_{\text{pmax}}$ . Our estimation method fitted a  $g_{\text{m}}$  for *Zea* of  $7.34$   
426  $\mu\text{mol m}^{-2} \text{s}^{-1} \text{Pa}^{-1}$ , which falls into the range of their measurements. Barbour et al. (2016)  
427 reported a little lower mesophyll conductance for *Zea* using  $^{18}\text{O}$  measurements.

428

### 429 **3.5 Validating transition point range**

430 We used chlorophyll fluorescence measurements from seven  $\text{C}_4$  species to test whether the  
431 upper and lower boundary  $\text{CO}_2$  concentrations, *CaL* and *CaH*, are reasonable (Table 3). The  
432 apparent quantum efficiency of PSII electron transport was calculated with  $\Delta F/F_{\text{m}'} = (F_{\text{m}'} -$



433  $F_s$ )  $F_m'$  (Genty, Briantais & Baker 1989). Fluorescence analysis (Baker et al. 2007) is a  
434 powerful tool for identifying the limitation states of  $C_3$  species (Sharkey et al. 2007). If  
435 Chlorophyll fluorescence is increasing with increasing  $CO_2$ ,  $A_n$  is limited by Rubisco  
436 carboxylation limited; when Chlorophyll fluorescence stays constant with increasing  $CO_2$ ,  
437  $A_n$  is limited by RuBP regeneration. For  $C_4$  species, however, the situation is more  
438 complicated. Since  $V_p$  could be limited by  $V_{pr}$  and  $V_{pc}$  (eq. (9)). Part of the RuBP  
439 carboxylation limited condition and RuBP regeneration limited condition for the  $C_3$  cycle  
440 will mix together, leading to a linear increase of fluorescence with increasing of  $CO_2$ , but of  
441 a small slope (Fig. S2). Thus, we can only obtain two boundaries of  $CO_2$  concentrations.  
442 Below the lower boundary,  $A$  and fluorescence increases with increasing  $C_i$  with a steep  
443 slope and  $A$  is RuBP carboxylation and PEP carboxylation limited (AEE); above the higher  
444 boundary,  $A$  and fluorescence is relatively constant along with the increase of  $C_i$  and  $A$  is  
445 RuBP regeneration and PEP regeneration limited (ATT). We measured fluorescence to test  
446 whether the upper and lower boundary  $CO_2$  concentrations,  $CaL$  and  $CaH$ , are reasonable. It  
447 seems all the  $CaL$  are above 14 Pa and all the  $CaH$  are below 65 Pa (Table 3). These results  
448 suggest that 10Pa-65Pa is a reasonable range for the transitional point.

449

450 **Table 3**  $CO_2$  concentration boundaries result for assimilation-limited conditions from fluorescence  
451 measurements for seven species. Low:  $CO_2$  concentration under which assimilation rate increases  
452 greatly with increasing  $CO_2$  (potentially assimilation is limited by PEP carboxylation and RuBP  
453 carboxylation). High:  $CO_2$  concentration above which assimilation rate no longer increases with  
454 increasing  $CO_2$  (potentially assimilation is limited by PEP regeneration and RuBP regeneration).  
455 Data show the mean (standard error).

---

| Species | <i>P. virgatum</i> | <i>P. amarum</i> | <i>S. scoparium</i> | <i>S. nutans</i> |
|---------|--------------------|------------------|---------------------|------------------|
|---------|--------------------|------------------|---------------------|------------------|

---

|          |                       |                  |                  |            |
|----------|-----------------------|------------------|------------------|------------|
| Low(Pa)  | 14.1(1.12)            | 18.0(1.09)       | 17.8(1.09)       | 17.6(0.28) |
| High(Pa) | 34.1(1.78)            | 55.5(1.40)       | 53.1(1.10)       | 63.1(2.07) |
| Species  | <i>T. dactyloides</i> | <i>T. flavus</i> | <i>B. mutica</i> |            |
| Low(Pa)  | 13.8(0.35)            | 14.9(2.35)       | 15.8(1.13)       |            |
| High(Pa) | 46.1(0.20)            | 41.4(1.73)       | 42.3(1.24)       |            |

456

#### 457 **4. DISCUSSION**

458 The photosynthetic parameters from the estimation method are good indicators for the  
459 biochemical and biophysical mechanisms underlying the photosynthesis processes of plants.  
460 Together with photosynthesis models, they can provide powerful information for  
461 evolutionary and ecological questions in both physiological and ecosystem response to  
462 natural environmental variation and climate change, to illustrate evolutionary trajectory of  
463 C<sub>4</sub> pathway, as well as in efforts to improve crop productivity (Osborne & Beerling, 2006;  
464 Osborne & Sack, 2012; Heckmann et al., 2013). Photosynthetic parameters represent  
465 different physiological traits, and comparison of these parameters within a phylogenetic  
466 background could help us to understand the further divergence of lineages and species  
467 through evolutionary time. Additionally, the response of productivity and carbon cycle of  
468 vegetation towards the future climate change depends heavily on photosynthesis parameter  
469 estimation as input parameters.

470

471 Each of the two different fitting procedures has advantages and disadvantages. Yin's method  
472 (Supplementary material II) uses the explicit calculation of assimilation rate and  
473 consequently gives lower estimation error. However, it needs a more accurate assignment of  
474 limitation states, especially at the lower end. Thus, Yin's method will be preferable if one

475 has additional support (e.g. fluorescence measurement) to define the limitation states;  
476 otherwise, the Yin's method may give unbalanced results (Fig. 3). However, Sharkey's  
477 method (Supplementary material I) usually can avoid unbalanced results even without  
478 ancillary measurements. Thus, it is better to use both procedures to support each other to  
479 find more accurate results. For example, one can first use Sharkey's method to get  
480 estimation results and limitation states, and then use them as initial values for Yin's method.

481

482 Our estimation methods yielded similar results when using models with and without  
483 carbonic anhydrase reaction processes. Although carbonic anhydrase activity may well be a  
484 limiting step for C<sub>4</sub> cycle (von Caemmerer et al., 2004; Studer et al., 2014; Boyd et al.,  
485 2015; Ubierna et al., 2017), its limitation did not greatly affect assimilation rates in this  
486 study. Including the carbonic anhydrase reaction makes the model more complex and  
487 difficult to get an explicit solution; therefore, the model without carbonic anhydrase could  
488 be used as a simplified form yielding flawed but 'nearly correct' predicted values as a part  
489 of larger models. However, carbonic anhydrase limitation of C<sub>4</sub> photosynthesis needs the  
490 further assessment from physiological or biochemical perspectives, and our estimation  
491 method provides another way to derive carbonic anhydrase parameters, which were  
492 comparable with *in vitro* measurements (Boyd et al., 2015). In addition, our results for  
493 models with and without carbonic anhydrase activity support the proposition of Cousins et al.  
494 (2007) that carbonic anhydrase activity may not be a limiting factor for A/C<sub>i</sub> curves of C<sub>4</sub>  
495 plants.

496

497 Our results show that despite a clear difference between the assumptions of how the

498 products of electron transport are distributed, the results were similar and comparable with  
499 studies using different models under measurements of high light intensity. The bump in the  
500 second model happens in AET. In AET, assimilation is limited by RuBP regeneration and  
501 PEP carboxylation; therefore, PEP regeneration is not reaching  $V_{pr}$ , and the extra electron  
502 transport in PEP regeneration could be freely assigned to RuBP regeneration. This effect  
503 will weaken as PEP carboxylation increases. However, under lower photosynthetic photon  
504 flux density, assimilation rate will be limited more by electron transport, and the separate  
505 assumptions concerning electron transport may start to show divergent results.

506

507 The photosynthetic parameters from the estimation method used together with  
508 photosynthesis models can provide information and inspiration about the evolutionary and  
509 physiological importance of different aspects of the  $C_4$  syndrome (Osborne & Sack, 2012;  
510 Heckmann et al., 2013), which can be investigated by empirical measurements. Several  
511 examples emanate from our simulation analysis: (1)  $\alpha$  represents the fraction of  $O_2$   
512 evolution from photosynthesis occurring in the bundle sheath cells (eq. (4)) and any  $\alpha > 0$   
513 means that  $O_2$  will accumulate in the bundle sheath cells, due to low  $g_{bs}$ . Both the sensitivity  
514 analysis and the simulation analysis showed the change of  $\alpha$  did not affect the estimated  
515 parameters and assimilation rates, because the high  $C_{bs}$  created by  $C_4$  carbon concentrating  
516 mechanism overcame any increase of  $O_{bs}$  and did not lead to high photorespiration. Thus,  
517 the compartmentation of  $O_2$  evolution may not have played an important role in the  
518 evolution of  $C_4$  photosynthesis. (2) A lower Rubisco specificity factor ( $\gamma^*$ ; eq. (11)) means  
519 lower specificity for  $O_2$ , higher specificity for  $CO_2$ , and lower photorespiration. In  $C_3$   
520 species, selection for Rubisco with lower specificity to  $O_2$  and high specificity of  $CO_2$  can

521 increase the carbon gain. However, there is a trade-off between the specificity of Rubisco  
522 for CO<sub>2</sub> and its catalytic rate (Savir et al., 2010; Studer et al., 2014). Based on this trade-off,  
523 we can hypothesize that since C<sub>4</sub> elevates CO<sub>2</sub> around Rubisco relative to the O<sub>2</sub>  
524 concentration, maintaining low specificity might be optimal, in order to get high catalytic  
525 rate of the enzyme to reach higher assimilation rate as shown by the empirical measurements  
526 of Sage (2002) and Savir et al. (2010). Our simulation analysis showed the increase of  
527 specificity for CO<sub>2</sub> (decrease of  $\gamma^*$ ) did not increase the assimilation rate much, which  
528 indicates the selection upon Rubisco specificity in C<sub>4</sub> plants should be relaxed. (3)  $g_{bs}$   
529 represents CO<sub>2</sub> leakage from bundle sheath to the mesophyll cell, and changes in  $g_{bs}$   
530 significantly change the assimilation rate and C<sub>bs</sub>. Therefore, avoiding CO<sub>2</sub> leakage was of  
531 great importance for the evolution and efficiency of C<sub>4</sub> photosynthesis pathway (Brown and  
532 Byrd, 1993; Ubierna et al., 2013; Kromdijk et al., 2014).

533

534 Although we have shown that parameter estimation can be achieved solely with A/C<sub>i</sub> curves,  
535 it is easy to combine our methods with ancillary measurements to yield more accurate  
536 estimation results by defining the parameters as estimated or known or add additional  
537 constraints (Supplementary Material IV). Yin et al. (2011b) proposed a method to obtain R<sub>d</sub>  
538 from the fluorescence-light curve, since the method used for C<sub>3</sub> species, the Laisk method, is  
539 inappropriate (Yin et al., 2011a). Additional measurement of dark respiration could be an  
540 approximation for R<sub>d</sub> or could help to provide a constraint for estimating R<sub>d</sub> in our  
541 estimating method. Ubierna et al. (2017) discussed the estimation method of  $g_m$  using  
542 instantaneous carbon isotope discrimination. With external measurement results, one can  
543 change estimated parameters (such as R<sub>d</sub>,  $g_m$  and  $J$ ) as input parameters, instead of output

544 parameters, in this curve fitting method (Supplementary material IV). Additional methods,  
545 such as in vitro measurements (Boyd et al., 2015; Pedomo et al., 2015) and membrane inlet  
546 mass spectrometry (Cousins et al., 2010) of  $V_{\text{cmax}}$ ,  $V_{\text{pmax}}$ , and carbonic anhydrase activity can  
547 also provide potential parameter values. Furthermore, if some output parameters are  
548 determined in the external measurements, one can also relax the input parameters (such as  
549  $g_{\text{bs}}$ ) and make them estimated parameters (Supplementary material IV).

550

## 551 **5. Conclusion**

552 We have developed new, accessible estimation tools for extracting  $C_4$  photosynthesis  
553 parameters from intensive  $A/C_i$  curves. Our estimation method is based on an established  
554 estimation protocol for  $C_3$  plants and makes several improvements upon  $C_4$  photosynthesis  
555 models. External measurements for specific parameters will increase the reliability of  
556 estimation methods and are summarized independently. We developed estimation methods  
557 with and without carbonic anhydrase activity. The comparison of these two methods allows  
558 for an estimation of carbonic anhydrase activity, and further shows that the method that did  
559 not consider carbonic anhydrase activity was a sufficient simplification for  $C_4$   
560 photosynthesis. We tested two assumptions related to whether the electron transport is freely  
561 distributed between RuBP regeneration and PEP regeneration or certain proportions are  
562 confined to the two mechanisms. They show similar results under high light, but they may  
563 diverge under low light intensities. Simulation test, out of sample test, fluorescence analysis,  
564 and sensitivity analysis confirmed that our methods gave robust estimation especially for  
565  $V_{\text{cmax}}$ ,  $J$ , and  $V_{\text{pmax}}$ .

566

567 **Author contributions**

568 HZ, EA and BH conceived the ideas, designed methodology, analyzed the data and led the  
569 writing of the manuscript; HZ collected the data; HZ and BH coordinate the study. All the  
570 authors contributed to the critical review of the manuscript and approved its final version.

571

572 **ACKNOWLEDGMENT**

573 We thank Dr. Jesse Nippert, Kansas State University, for providing the fluorometer chamber.

## REFERENCES

- Baker NR, Harbinson J, Kramer DM.** 2007. Determining the limitations and regulation of photosynthetic energy transduction in leaves. *Plant, Cell and Environment* **30**, 1107–1125.
- Barbour MM, Evans JR, Simonin KA, Von Caemmerer S** 2016. Online CO<sub>2</sub> and H<sub>2</sub>O oxygen isotope fractionation allows estimation of mesophyll conductance in C<sub>4</sub> plants, and reveals that mesophyll conductance decreases as leaves age in both C<sub>4</sub> and C<sub>3</sub> plants. *New Phytologist* **210**, 875-889.
- Bellasio C, Beerling DJ, Griffiths H.** 2015. Deriving C<sub>4</sub> photosynthetic parameters from combined gas exchange and chlorophyll fluorescence using an Excel tool: theory and practice. *Plant, Cell and Environment* doi: 10.1111/pce.12626.
- Bellasio C, Burgess SJ, Griffiths H, Hibberd JM.** 2014. A high throughput gas exchange screen for determining rates of photorespiration or regulation of C<sub>4</sub> activity. *Journal of experimental botany* **65**, 3769-3779.
- Boyd RA, Gandin A, Cousins AB.** 2015. Temperature responses of C<sub>4</sub> photosynthesis: biochemical analysis of Rubisco, phosphoenolpyruvate carboxylase, and carbonic anhydrase in *Setaria viridis*. *Plant Physiology* **169**, 1850–1861.
- Brown RH, Byrd GT.** 1993. Estimation of bundle sheath cell conductance in C<sub>4</sub> species and O<sub>2</sub> insensitivity of photosynthesis. *Plant Physiology* **103**, 1183-1188.
- von Caemmerer S.** 2000. Biochemical models of photosynthesis. In *Techniques in Plant Sciences* p. 196. CSIRO Publishing, Colingwood, Australia.
- Von Caemmerer S, Quinn V, Hancock NC, Price GD, Furbank RT, Ludwig M.** 2004. Carbonic anhydrase and C<sub>4</sub> photosynthesis: a transgenic analysis. *Plant, Cell & Environment* **27**, 697-703.
- Chi Y, Xu M, Shen R, Yang Q, Huang B, Wan S.** 2013. Acclimation of foliar respiration and photosynthesis in response to experimental warming in a temperate steppe in northern China. *PLoS One*, **8**(2):e56482.
- Cousins AB, Baroli I, Badger MR, Ivakov A, Lea PJ, Leegood RC, Von Caemmerer S.** 2007. The Role of Phosphoenolpyruvate Carboxylase during C<sub>4</sub> Photosynthetic Isotope Exchange and Stomatal Conductance. *Plant Physiology* **145**, 1006-1017.
- Cousins AB, Ghannoum O, von Caemmerer S, Badger MR.** 2010. Simultaneous determination of Rubisco carboxylase and oxygenase kinetic parameters in *Triticum aestivum* and *Zea mays* using membrane inlet mass spectrometry. *Plant, Cell and Environment* **33**, 444–452.



- Dubois JB, Fiscus EL, Booker FL, Flowers MD, Reid CD.** 2007. Optimizing the statistical estimation of the parameters of the Farquhar-von Caemmerer-Berry model of photosynthesis. *New Phytologist* **176**, 402–414.
- Ethier GJ, Livingston NJ, Harrison DL, Black TA, Moran JA.** 2006 Low stomatal and internal conductance to CO<sub>2</sub> versus Rubisco deactivation as determinants of the photosynthetic decline of ageing evergreen leaves. *Plant, Cell and Environment* **29**, 2168-2184.
- Farquhar GD, von Caemmerer S, Berry JA.** 1980 A biochemical model of photosynthetic carbon dioxide assimilation in leaves of 3-carbon pathway species. *Planta* **149**, 78-90.
- Genty B, Briantais J, Baker N.** 1989. The relationship between the quantum yield of photosynthetic electron transport and quenching of chlorophyll fluorescence. *Biochimica et Biophysica Acta* **990**, 87–92.
- Gu L, Pallardy SG, Tu K, Law BE, Wullschlegel SD.** 2010. Reliable estimation of biochemical parameters from C<sub>3</sub> leaf photosynthesis-intercellular carbon dioxide response curves. *Plant, Cell and Environment* **33**, 1852-1874.
- Hatch MD.** 1987. C<sub>4</sub> photosynthesis: a unique blend of modified biochemistry, anatomy and ultrastructure. *Biochimica et Biophysica Acta* **895**, 81-106.
- Hatch MD, Burnell JN.** 1990. Carbonic anhydrase activity in leaves and its role in the first step of C<sub>4</sub> photosynthesis. *Plant Physiology* **93**, 825–828.
- Heckmann D, Schulze S, Denton A, Gowik U, Westhoff P, Weber AP, Lercher MJ.** 2013. Predicting C<sub>4</sub> photosynthesis evolution: Modular, individually adaptive steps on a Mount Fuji fitness landscape. *Cell* **153**, 1579-1588.
- Jenkins CLD, Furbank RT, Hatch MD.** 1989. Mechanism of C<sub>4</sub> photosynthesis. A model describing the inorganic carbon pool in bundle-sheath cells. *Plant Physiology* **91**, 1372–1381.
- Kromdijk J, Ubierna N, Cousins AB, Griffiths H.** 2014. Bundle-sheath leakiness in C<sub>4</sub> photosynthesis: a careful balancing act between CO<sub>2</sub> concentration and assimilation. *Journal of experimental botany* **65**, 3443-3457.
- Miao ZW, Xu M, Lathrop RG, Wang YF.** 2009. Comparison of the A-C<sub>c</sub> curve fitting methods in determining maximum ribulose 1.5-bisphosphate carboxylase/oxygenase carboxylation rate, potential light saturated electron transport rate and leaf dark respiration. *Plant, Cell and Environment* **32**, 1191-1204.
- Osborne CP, Beerling DJ.** 2006. Nature's green revolution: the remarkable evolutionary rise of C-4 plants. *Philosophical Transactions of The Royal Society B* **361**, 173-194.

- Osborne CP, Sack L.** 2012. Evolution of C<sub>4</sub> plants: a new hypothesis for an interaction of CO<sub>2</sub> and water relations mediated by plant hydraulics. *Philosophical Transactions of The Royal Society B* **367**, 583-600.
- Pedomo JA, Cavanagh AP, Kubien DS, Galmes J.** 2015. Temperature dependence of *in vitro* Rubisco kinetics in species of *Flaveria* with different photosynthetic mechanisms. *Photosynthesis Research* **124**, 67–75.
- Pinto H, Sharwood RE, Tissue DT, Ghannoum O.** 2014. Photosynthesis of C<sub>3</sub>, C<sub>3</sub>-C<sub>4</sub>, and C<sub>4</sub> grasses at glacial CO<sub>2</sub>. *Journal of Experimental Botany* **65**, 3669-3681.
- Sage RF.** 2002. Variation in the  $k_{cat}$  of Rubisco in C<sub>3</sub> and C<sub>4</sub> plants and some implications for photosynthetic performance at high and low temperature. *Journal of Experimental Botany* **53**, 609-620.
- Savir Y, Noor E, Milo R, Tlustý T.** 2010. Cross-species analysis traces adaptation of Rubisco toward optimality in a low-dimensional landscape. *Proceedings of the National Academy of Sciences* **107**, 3475-3480.
- Sharkey TD, Bernacchi CJ, Farquhar GD, Singsaas EL.** 2007. Fitting photosynthetic carbon dioxide response curves for C<sub>3</sub> leaves. *Plant, Cell and Environment* **30**, 1035–1040.
- Studer RA, Christin PA, Williams MA, Orengo CA.** 2014. Stability-activity tradeoffs constrain the adaptive evolution of Rubisco. *Proceedings of the National Academy of Science of the United States of America* **111**, 2223–2228.
- Ubierna N, Gandin A, Boyd RA, Cousins AB.** 2017. Temperature response of mesophyll conductance in three C<sub>4</sub> species calculated with two methods: <sup>18</sup>O discrimination and *in vitro* V<sub>pmax</sub>. *New Phytologist* **214**, 66-80.
- Ubierna N, Sun W, Kramer DM, Cousins AB.** 2013. The efficiency of C<sub>4</sub> photosynthesis under low light conditions in *Zea mays*, *Miscanthus X giganteus* and *Flaveria bidentis*. *Plant, Cell and Environment* **36**, 365-381. □
- Xu LK, Baldocchi DD.** 2003 Seasonal trends in photosynthetic parameters and stomatal conductance of blue oak (*Quercus douglasii*) under prolonged summer drought and high temperature. *Tree Physiology* **23**, 865-877.
- Yin X, Struik PC, Romero P, Harbinson J, Evers JB, Van Der Putten PEL, Vos JAN.** 2009. Using combined measurements of gas exchange and chlorophyll fluorescence to estimate parameters of a biochemical C<sub>3</sub> photosynthesis model: a critical appraisal and a new integrated approach applied to leaves in a wheat (*Triticum aestivum*) canopy. *Plant, Cell and Environment* **32**, 448-464.

**Yin X, Sun Z, Struik PC, Gu J.** 2011a. Evaluating a new method to estimate the rate of leaf respiration in the light by analysis of combined gas exchange and chlorophyll fluorescence measurements. *Journal of Experimental Botany* **62**, 3489-3499.

**Yin XY, Sun ZP, Struik PC, Van der Putten PEL, Van Ieperen W, Harbinson J.** 2011b. Using a biochemical C<sub>4</sub> photosynthesis model and combined gas exchange and chlorophyll fluorescence measurements to estimate bundle-sheath conductance of maize leaves differing in age and nitrogen content. *Plant, Cell and Environment* **34**, 2183-2199.
